# Supplementary material for: A wavy graphene/platinum hybrid with increased electroactivity for the methanol oxidation reaction
Source: Royal Society of Chemistry journal article supplement (doi:10.1039/c3ta14134a), 2013-11-26
Supplement: c3ta14134a.pdf [file c3ta14134a.pdf]

# Supporting Information

## A Wavy Graphene/Platinum Hybrid with Increased Electroactivity for the Methanol Oxidation Reaction

Jiao-Jing Shao,<sup>a,b,†</sup> Zheng-Jie Li,<sup>a,b,c,†</sup> Chen Zhang,<sup>a,b</sup> Li-Fang Zhang<sup>a</sup> and Quan-Hong Yang<sup>a,b,c,\*</sup>

<sup>a</sup> School of Chemical Engineering and Technology, Tianjin University, Tianjin 300072, China

<sup>b</sup> The Synergistic Innovation Center of Chemistry and Chemical Engineering of Tianjin, Tianjin, 300072, China

<sup>c</sup> Engineering Laboratory for Functionalized Carbon Materials, Graduate School at Shenzhen, Tsinghua University, Shenzhen 518055, China

† These authors contribute equally to this work

Corresponding Author: Quan-Hong Yang

Email: [qhyangcn@tju.edu.cn](mailto:qhyangcn@tju.edu.cn) or [yang.quanhong@sz.tsinghua.edu.cn](mailto:yang.quanhong@sz.tsinghua.edu.cn)

## Figures

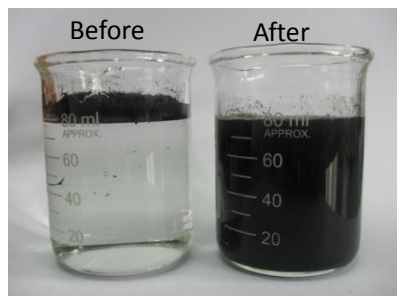

Figure S1. Photos of the VPG in water before (left) and after (right) using CTAB.

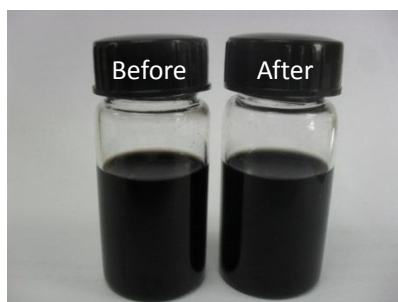

Figure S2. Photos of the w-GN suspension free of surfactant before (left) and after (right) being centrifuged at 3800 rpm for 20min.

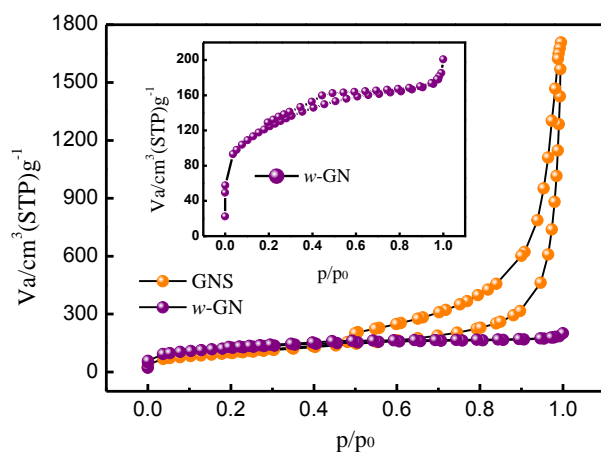

Figure S3 Comparative  $\text{N}_2$  adsorption-desorption isotherms of VPG and w-GN. Inset: Nitrogen adsorption-desorption isotherm of w-GN in details.

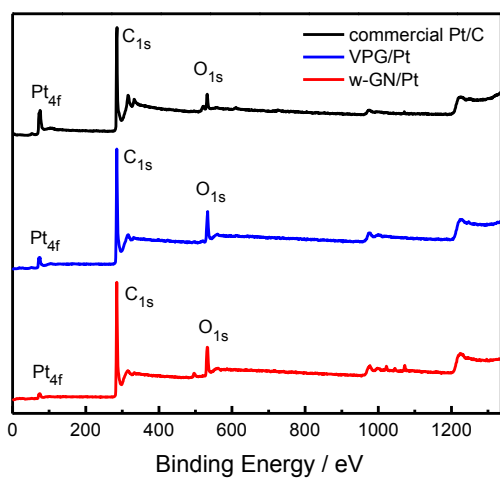

Figure S4. XPS profiles of commercial Pt/C, VPG/Pt and w-GN/Pt catalysts.

Table S1. Atomic ratios of catalysts

|                 | C (Atom/%) | O (Atom/%) | O/C   |
|-----------------|------------|------------|-------|
| w-GN/Pt         | 88.19      | 11.39      | 0.129 |
| VPG/Pt          | 87.65      | 11.38      | 0.130 |
| Commercial Pt/C | 91.45      | 6.13       | 0.067 |
